# Supplementary material for: Low level SARS-CoV-2 RNA detected in plasma samples from a cohort of Nigerians: Implications for blood transfusion
Source: PLoS One. 2021 Jun 10;16(6):e0252611. doi: 10.1371/journal.pone.0252611 (PMC8191972; doi:10.1371/journal.pone.0252611)
Supplement: S1 Data — (XLSX) [file pone.0252611.s001.xlsx]

## Sheet: working data
Sample ID	Date of Onset of Symptoms (if known)	Date of Exposure to COVID individual (If known)	Sample Type in addition to Nasal & Oral swab	AGE RANGE	SEX	Nasal & Oral PCR Result (P/N/ND); ND = not determined	Plasma PCR Result (P/N/ND); ND = not determined
S1	nil	nil	PLASMA	41-50	M	N	N									IgG positive				Serum			P	Y	P	P
S2	nil	nil	PLASMA	31-40	F	N	N									IgM positive				EDTA plasma			N	N	N	N
S3	nil	nil	PLASMA	31-40	F	N	N									Dual IgG/IgM positive				heparin plasma					ND	Unknown
S4	nil	nil	PLASMA	41-50	M	N	N													capillary whole blood
S5	nil	nil	PLASMA	31-40	F	N	N
S6	nil	nil	PLASMA	41-50	M	N	N									Clinical Signs/Symptoms
S7	nil	nil	PLASMA	51-60	M	N	N									Asymptomatic
S8	nil	nil	PLASMA	31-40	F	N	N									Mild
S9	nil	nil	PLASMA	41-50	M	N	N									Moderate							Nasal
S10	nil	nil	PLASMA	31-40	F	N	N									Severe							Oral
S11	nil	nil	PLASMA	31-40	M	N	N																Anal
S12	nil	nil	PLASMA	21-30	F	N	N
S13	nil	nil	PLASMA	31-40	F	N	N
S14	nil	nil	PLASMA	51-60	M	N	N
S15	nil	nil	PLASMA	21-30	F	N	N
S16	nil	nil	PLASMA	61-70	F	N	N
S17	nil	nil	PLASMA	61-70	M	N	N									Clinical Signs/Symptoms
S18	nil	nil	PLASMA	31-40	M	N	N									Asymptomatic
S19	nil	nil	PLASMA	21-30	M	N	N									Mild
S20	nil	nil	PLASMA	31-40	M	N	N									Moderate							Nasal
S21	nil	nil	PLASMA	31-40	M	N	N									Severe							Oral
S22	nil	nil	PLASMA	31-40	F	N	N
S23	nil	nil	PLASMA	31-40	F	N	N																Anal
S24	nil	nil	PLASMA	21-30	M	N	N
S25	nil	nil	PLASMA	21-30	F	N	N
S26	nil	nil	PLASMA	11-20.	M	N	N
S27	nil	nil	PLASMA	71-80	M	N	N
S28	nil	nil	PLASMA	21-30	M	N	N
S29	nil	nil	PLASMA	31-40	F	N	N									Asymptomatic
S30	nil	nil	PLASMA	61-70	M	N	N									Mild
S31	nil	nil	PLASMA	51-60	M	N	N									Moderate							Nasal
S32	nil	nil	PLASMA	31-40	M	N	N									Severe							Oral
S33	nil	nil	PLASMA	41-50	F	P	N																Anal
S34	nil	nil	PLASMA	41-50	M	P	N
S35	nil	nil	PLASMA	31-40	M	N	N
S36	nil	nil	PLASMA	31-40	F	N	N									IgG positive				Serum			P	Y	P	P
S37	nil	nil	PLASMA	41-50	M	N	N									IgM positive				EDTA plasma			N	N	N	N
S38	nil	nil	PLASMA	31-40	M	N	N									Dual IgG/IgM positive				heparin plasma					ND	Unknown
S39	nil	nil	PLASMA	51-60	F	P	N									Invalid (No Control Line)				venous whole blood
S40	nil	nil	PLASMA	51-60	M	P	N													capillary whole blood
S41	nil	nil	PLASMA	31-40	M	P	N
S42	nil	nil	PLASMA	21-30	F	N	N
S43	nil	nil	PLASMA	51-60	F	P	N
S44	nil	nil	PLASMA	31-40	F	P	P
S45	nil	nil	PLASMA	31-40	F	P	N
S46	nil	nil	PLASMA	31-40	M	P	N
S47	nil	nil	PLASMA	51-60	M	P	N
S48	nil	nil	PLASMA	51-60	F	P	N
S49	nil	nil	PLASMA	61-70	F	P	N
S50	nil	nil	PLASMA	31-40	F	P	N
S51	nil	nil	PLASMA	61-70	M	P	P
S52	nil	nil	PLASMA	41-50	F	P	N
S53	nil	nil	PLASMA	31-40	M	P	N
S54	nil	nil	PLASMA	31-40	F	P	N
S55	nil	nil	PLASMA	51-60	M	P	N
S56	nil	nil	PLASMA	21-30	F	N	N
S57	nil	nil	PLASMA	31-40	M	P	N
S58	nil	nil	PLASMA	41-50	M	N	N
S59	nil	nil	PLASMA	41-50	M	P	N
S60	nil	nil	PLASMA	31-40	F	P	N
S61	nil	nil	PLASMA	31-40	F	N	N
S62	nil	nil	PLASMA	41-50	M	P	N
S63	nil	nil	PLASMA	21-30	M	P	P
S64	nil	nil	PLASMA	31-41	M	N	N
S65	nil	nil	PLASMA	51-60	M	P	N
S66	nil	nil	PLASMA	61-70	F	N	N
S67	nil	nil	PLASMA	41-50	M	N	N
S68	nil	nil	PLASMA	51-60	M	N	N
S69	nil	nil	PLASMA	51-60	F	N	N
S70	nil	nil	PLASMA	41-50	M	N	N
S71	nil	nil	PLASMA	32-40	F	N	N
S72	nil	nil	PLASMA	61-70	F	N	N
S73	nil	nil	PLASMA	21-30	M	P	N
S74	nil	nil	PLASMA	21-30	M	P	N
S75	nil	nil	PLASMA	31-40	M	P	N
S76	nil	nil	PLASMA	51-60	F	P	N
S77	nil	nil	PLASMA	31-40	M	P	N
S78	nil	nil	PLASMA	61-70	F	P	N
S79	nil	nil	PLASMA	11-20.	M	P	N
S80	nil	nil	PLASMA	41-50	F	P	N
S81	nil	nil	PLASMA	21-30	M	P	N
S82	nil	nil	PLASMA	51-60	M	P	N
S83	nil	nil	PLASMA	61-70	F	P	N
S84	nil	nil	PLASMA	41-50	M	P	N
S85	nil	nil	PLASMA	41-50	M	P	N
S86	nil	nil	PLASMA	21-30	F	P	N
S87	nil	nil	PLASMA	41-50	M	P	N
S88	nil	nil	PLASMA	31-40	F	P	N
S89	nil	nil	PLASMA	21-30	F	P	N
S90	nil	nil	PLASMA	61-70	M	P	N
S91	nil	nil	PLASMA	41-50	F	P	N
S92	nil	nil	PLASMA	41-50	M	P	N
S93	nil	nil	PLASMA	21-30	F	P	N
S94	nil	nil	PLASMA	21-30	M	P	N
S95	nil	nil	PLASMA	41-50	M	P	N
S96	nil	nil	PLASMA	51-60	M	P	N
S97	nil	nil	PLASMA	21-30	F	P	N
S98	nil	nil	PLASMA	51-60	M	P	N
S99	nil	nil	PLASMA	21-30	M	P	N
S100	nil	nil	PLASMA	31-40	M	P	N
S101	nil	nil	PLASMA	31-40	F	P	N
S102	nil	nil	PLASMA	21-30	M	P	N
S103	nil	nil	PLASMA	21-30	M	P	P
S104	nil	nil	PLASMA	31-40	F	P	P
S105	nil	nil	PLASMA	31-40	M	P	N
S106	nil	nil	PLASMA	41-50	M	P	N
S107	nil	nil	PLASMA	61-70	M	P	N
S108	nil	nil	PLASMA	31-40	F	P	N
S109	nil	nil	PLASMA	21-30	M	P	N
S110	nil	nil	PLASMA	41-50	M	P	N
S111	nil	nil	PLASMA	31-40	F	P	N
S112	nil	nil	PLASMA	51-60	M	P	N
S113	nil	nil	PLASMA	51-60	M	P	N
S114	nil	nil	PLASMA	41-50	M	P	N
S115	nil	nil	PLASMA	31-40	F	P	N
S116	nil	nil	PLASMA	31-40	M	P	P
S117	nil	nil	PLASMA	31-40	M	P	N
S118	nil	nil	PLASMA	31-40	F	P	N
S119	nil	nil	PLASMA	41-50	M	P	N
S120	nil	nil	PLASMA	51-60	F	P	N
S121	nil	nil	PLASMA	31-40	M	P	N
S122	nil	nil	PLASMA	51-60	F	P	N
S123	nil	nil	PLASMA	31-40	M	P	N
S124	nil	nil	PLASMA	31-40	F	N	N
S125	nil	nil	PLASMA	41-50	M	N	N
